# Supplementary material
Source: publisher figshare collection journal article supplement (https://acs.figshare.com/ndownloader/files/4559755)
Supplement: Supplementary file 1 [file 4559755]

**Supporting Information – XPS spectra**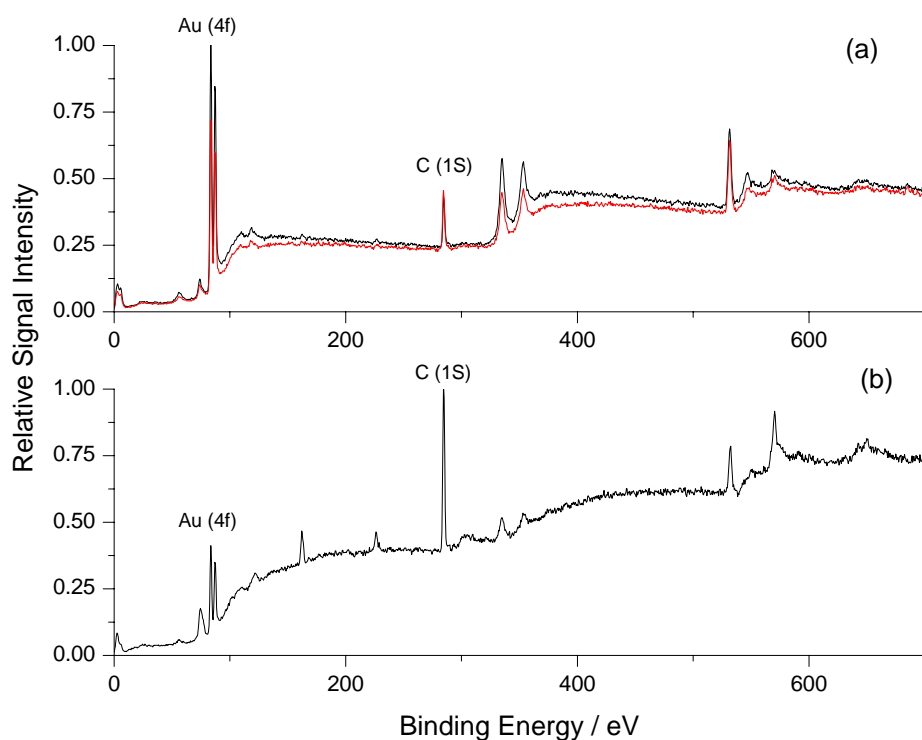

Peak-normalized XPS spectra of C<sub>6</sub>H<sub>13</sub>-SAMs. (a) as prepared, freshly out of solution (red line), and in the vacuum chamber at the base pressure for 2.5 hours (black line); (b) exposed to NO<sub>2</sub> in reaction chamber for ~ 1 hr. The spectra show that the SAM composition is effectively unchanged, relative to a freshly prepared sample, through being in vacuum with no NO<sub>2</sub> present. Exposure to NO<sub>2</sub> results in obvious alterations to the composition, with the C (1s) peak now dominating over the Au (4f) peak.
